# Supplementary figures and images for: Downregulation of glucose-6-phosphate dehydrogenase contributes to diabetic neuropathic pain through upregulation of toll-like receptor 4 in rats
Source: PubMed Central journal article supplement — Mol Pain. 2019 Apr 26;15:1744806919838659. doi: 10.1177/1744806919838659 (PMC6487759; doi:10.1177/1744806919838659), 2019-04-26

Supplementary figure 1

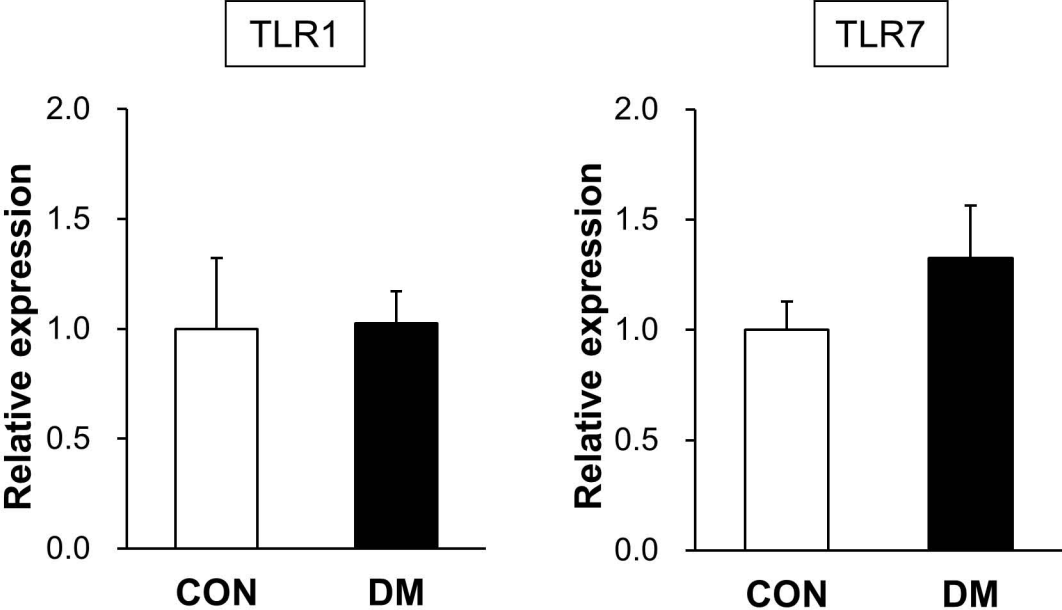

Supplement: Supplemental_Material.pdf [file Supplemental_Material.pdf]
